# Supplementary material for: Africa’s oldest dinosaurs reveal early suppression of dinosaur distribution
Source: Springer Nature journal article supplement (doi:10.1038/s41586-022-05133-x), 2022-08-31
Supplement: 41586_2022_5133_MOESM2_ESM.pdf [file 41586_2022_5133_MOESM2_ESM.pdf]

## Reporting Summary

Nature Portfolio wishes to improve the reproducibility of the work that we publish. This form provides structure for consistency and transparency in reporting. For further information on Nature Portfolio policies, see our [Editorial Policies](#) and the [Editorial Policy Checklist](#).

### Statistics

For all statistical analyses, confirm that the following items are present in the figure legend, table legend, main text, or Methods section.

n/a Confirmed

- The exact sample size ( $n$ ) for each experimental group/condition, given as a discrete number and unit of measurement
- A statement on whether measurements were taken from distinct samples or whether the same sample was measured repeatedly
- The statistical test(s) used AND whether they are one- or two-sided  
*Only common tests should be described solely by name; describe more complex techniques in the Methods section.*
- A description of all covariates tested
- A description of any assumptions or corrections, such as tests of normality and adjustment for multiple comparisons
- A full description of the statistical parameters including central tendency (e.g. means) or other basic estimates (e.g. regression coefficient) AND variation (e.g. standard deviation) or associated estimates of uncertainty (e.g. confidence intervals)
- For null hypothesis testing, the test statistic (e.g.  $F$ ,  $t$ ,  $r$ ) with confidence intervals, effect sizes, degrees of freedom and  $P$  value noted  
*Give  $P$  values as exact values whenever suitable.*
- For Bayesian analysis, information on the choice of priors and Markov chain Monte Carlo settings
- For hierarchical and complex designs, identification of the appropriate level for tests and full reporting of outcomes
- Estimates of effect sizes (e.g. Cohen's  $d$ , Pearson's  $r$ ), indicating how they were calculated

*Our web collection on [statistics for biologists](#) contains articles on many of the points above.*

### Software and code

Policy information about [availability of computer code](#)

Data collection

*Provide a description of all commercial, open source and custom code used to collect the data in this study, specifying the version used OR state that no software was used.*

Data analysis

Beast 2, v. 2.6.3 for Bayesian phylogenetic inference; R statistical environment v. 4.2.0 with BioGeoBEARS package 1.1.2 for biogeographical analysis; TNT v. 1.5 for parsimony phylogenetic inference. All software and code is available on the online repository DRYAD (<https://doi.org/10.5061/dryad.pg4f4qrqd>)

For manuscripts utilizing custom algorithms or software that are central to the research but not yet described in published literature, software must be made available to editors and reviewers. We strongly encourage code deposition in a community repository (e.g. GitHub). See the Nature Portfolio [guidelines for submitting code & software](#) for further information.

### Data

Policy information about [availability of data](#)

All manuscripts must include a [data availability statement](#). This statement should provide the following information, where applicable:

- Accession codes, unique identifiers, or web links for publicly available datasets
- A description of any restrictions on data availability
- For clinical datasets or third party data, please ensure that the statement adheres to our [policy](#)

All data files used for analyses are hosted on DRYAD (<https://doi.org/10.5061/dryad.pg4f4qrqd>). All fossils are deposited in recognized natural history institutions. To preserve the integrity of the fossil localities and the natural history resources of Zimbabwe, we do not present the geographic coordinate data here. Geographic coordinate data are available on request from the Natural History Museum of Zimbabwe (NHMZ), and are recorded in the specimen catalog and records of the NHMZ for full reproducibility.

## Field-specific reporting

Please select the one below that is the best fit for your research. If you are not sure, read the appropriate sections before making your selection.

Life sciences     Behavioural & social sciences     Ecological, evolutionary & environmental sciences

For a reference copy of the document with all sections, see [nature.com/documents/nr-reporting-summary-flat.pdf](https://www.nature.com/documents/nr-reporting-summary-flat.pdf)

## Ecological, evolutionary & environmental sciences study design

All studies must disclose on these points even when the disclosure is negative.

|                                   |                                                                                                                                                                                                                                                   |
|-----------------------------------|---------------------------------------------------------------------------------------------------------------------------------------------------------------------------------------------------------------------------------------------------|
| Study description                 | Recovery of fossilized material from the Triassic of Zimbabwe; placing material into a phylogeny of early dinosaurs and using this phylogeny to test hypothesis of biogeographic dispersal                                                        |
| Research sample                   | Fossils recovered from a single site in the Pebbly Arkose Formation of northern Zimbabwe: a sauropodomorph ( <i>Mbiresaurus raathi</i> , gen. et sp. nov.), a herrerasaurid, a hyperodapedontine rhynchosaur, a traversodontid cynodont, aetosaur |
| Sampling strategy                 | Standard palaeontological excavation methods                                                                                                                                                                                                      |
| Data collection                   | Anatomical and histological observation                                                                                                                                                                                                           |
| Timing and spatial scale          | Fieldwork proceeded July–August 2017; May–June 2019                                                                                                                                                                                               |
| Data exclusions                   | NA                                                                                                                                                                                                                                                |
| Reproducibility                   | All fossils repositied in recognized natural history museums                                                                                                                                                                                      |
| Randomization                     | NA                                                                                                                                                                                                                                                |
| Blinding                          | NA                                                                                                                                                                                                                                                |
| Did the study involve field work? | <input type="checkbox"/> Yes <input type="checkbox"/> No                                                                                                                                                                                          |

## Field work, collection and transport

|                        |                                               |
|------------------------|-----------------------------------------------|
| Field conditions       | Dry season, warm, mild, no rainfall           |
| Location               | Dande Communal Area, Mbire District, Zimbabwe |
| Access & import/export | NA                                            |
| Disturbance            | NA                                            |

## Reporting for specific materials, systems and methods

We require information from authors about some types of materials, experimental systems and methods used in many studies. Here, indicate whether each material, system or method listed is relevant to your study. If you are not sure if a list item applies to your research, read the appropriate section before selecting a response.

### Materials & experimental systems

| n/a                                 | Involved in the study                                             |
|-------------------------------------|-------------------------------------------------------------------|
| <input checked="" type="checkbox"/> | <input type="checkbox"/> Antibodies                               |
| <input checked="" type="checkbox"/> | <input type="checkbox"/> Eukaryotic cell lines                    |
| <input type="checkbox"/>            | <input checked="" type="checkbox"/> Palaeontology and archaeology |
| <input checked="" type="checkbox"/> | <input type="checkbox"/> Animals and other organisms              |
| <input checked="" type="checkbox"/> | <input type="checkbox"/> Human research participants              |
| <input checked="" type="checkbox"/> | <input type="checkbox"/> Clinical data                            |
| <input checked="" type="checkbox"/> | <input type="checkbox"/> Dual use research of concern             |

### Methods

| n/a                                 | Involved in the study                           |
|-------------------------------------|-------------------------------------------------|
| <input checked="" type="checkbox"/> | <input type="checkbox"/> ChIP-seq               |
| <input checked="" type="checkbox"/> | <input type="checkbox"/> Flow cytometry         |
| <input checked="" type="checkbox"/> | <input type="checkbox"/> MRI-based neuroimaging |

## Palaeontology and Archaeology

---

- Specimen provenance
- Specimen deposition
- Dating methods
- Tick this box to confirm that the raw and calibrated dates are available in the paper or in Supplementary Information.
- Ethics oversight

Note that full information on the approval of the study protocol must also be provided in the manuscript.
